# Supplementary material for: Resource limitation and responses to rivals in males of the fruit fly Drosophila melanogaster
Source: PubMed Central journal article supplement (PMC5082519; doi:10.1111/jeb.12924), 2016-07-15

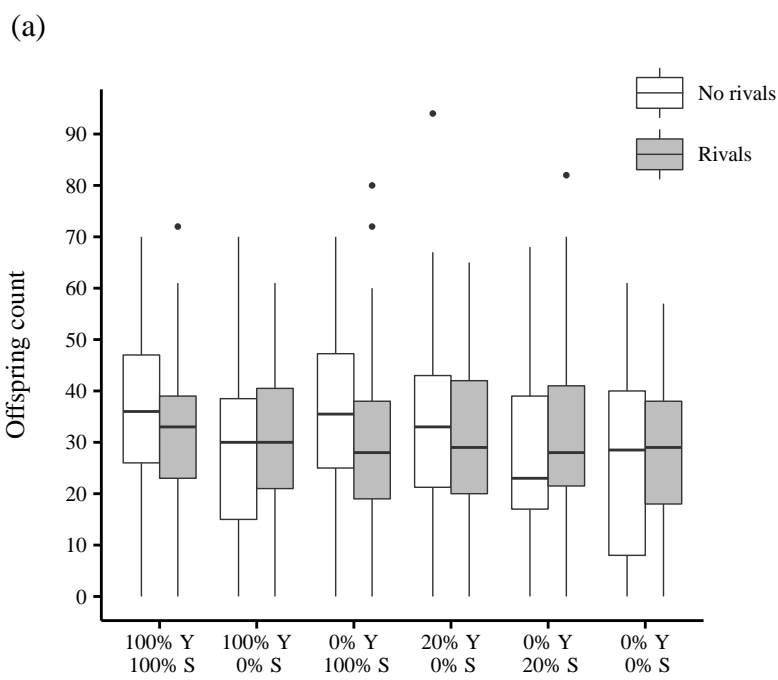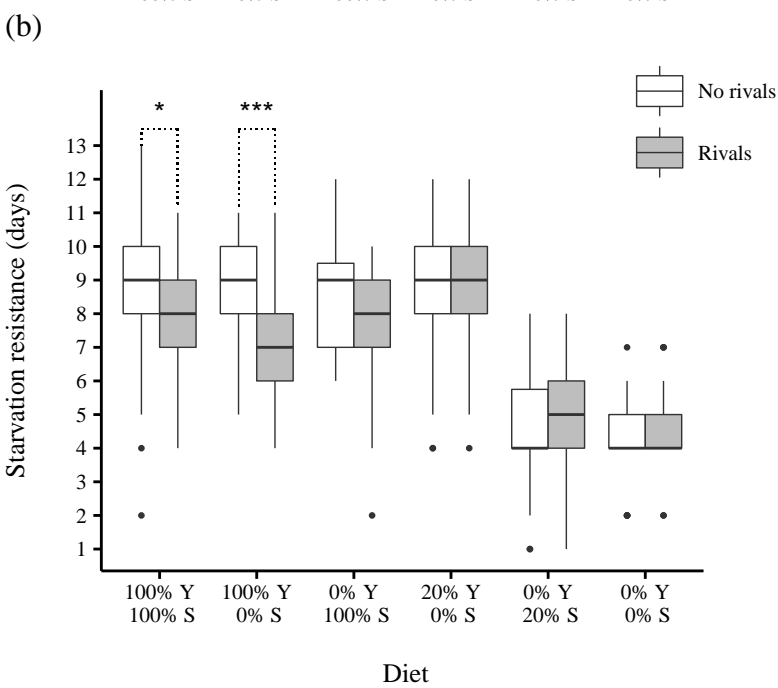

Supplement: JEB-29-2010-s002.pdf [file JEB-29-2010-s002.pdf]
